# Supplementary material for: The genome of common long-arm octopus Octopus minor
Source: PubMed Central journal article supplement (PMC6279123; doi:10.1093/gigascience/giy119), 2018-09-25

|                                                      |                                                                                                                                                                                                                                                                                                                                                                                                                                                                                                                                                                                                                                                                                                                                                                                                                                                                                                                                                                                                                                                                                                                                                                                                                                                                                                                                                                                |                 |
|------------------------------------------------------|--------------------------------------------------------------------------------------------------------------------------------------------------------------------------------------------------------------------------------------------------------------------------------------------------------------------------------------------------------------------------------------------------------------------------------------------------------------------------------------------------------------------------------------------------------------------------------------------------------------------------------------------------------------------------------------------------------------------------------------------------------------------------------------------------------------------------------------------------------------------------------------------------------------------------------------------------------------------------------------------------------------------------------------------------------------------------------------------------------------------------------------------------------------------------------------------------------------------------------------------------------------------------------------------------------------------------------------------------------------------------------|-----------------|
| <b>Manuscript Number:</b>                            | GIGA-D-18-00174R1                                                                                                                                                                                                                                                                                                                                                                                                                                                                                                                                                                                                                                                                                                                                                                                                                                                                                                                                                                                                                                                                                                                                                                                                                                                                                                                                                              |                 |
| <b>Full Title:</b>                                   | The genome of common long-arm octopus <i>Octopus minor</i>                                                                                                                                                                                                                                                                                                                                                                                                                                                                                                                                                                                                                                                                                                                                                                                                                                                                                                                                                                                                                                                                                                                                                                                                                                                                                                                     |                 |
| <b>Article Type:</b>                                 | Data Note                                                                                                                                                                                                                                                                                                                                                                                                                                                                                                                                                                                                                                                                                                                                                                                                                                                                                                                                                                                                                                                                                                                                                                                                                                                                                                                                                                      |                 |
| <b>Funding Information:</b>                          | MABIK<br>(2018M00900)                                                                                                                                                                                                                                                                                                                                                                                                                                                                                                                                                                                                                                                                                                                                                                                                                                                                                                                                                                                                                                                                                                                                                                                                                                                                                                                                                          | Dr. Hye Suck An |
| <b>Abstract:</b>                                     | <p>Background: The common long-arm octopus (<i>Octopus minor</i>) is found in mudflats of subtidal zones and faces numerous environmental challenges. The ability to adapt its morphology and behavioural repertoire to diverse environmental conditions makes the species a promising model to understand genomic adaptation and evolution in cephalopods. Findings: The final genome assembly of <i>O. minor</i> is 5.09 Gb, with a contig N50 size of 197 kb and longest size of 3.027 Mb, from a total of 419 Gb raw reads generated using PacBio RS II platform. We identified 30,010 genes and 44.43% of the genome is composed of repeat elements. The genome-wide phylogenetic tree indicated the divergence time between <i>O. minor</i> and <i>O. bimaculoides</i> was estimated to be 43 million years ago (Mya) based on single-copy orthologous genes. In total, 178 gene families are expanded in <i>O. minor</i> in the 14 bilaterian species. Conclusion: We found that the <i>O. minor</i> genome was larger than that of closely related <i>O. bimaculoides</i>, and this difference could be explained by enlarged introns and recently diversified transposable elements. The high-quality <i>O. minor</i> genome assembly provides a valuable resource for understanding octopus genome evolution and the molecular basis of adaptations to mudflats.</p> |                 |
| <b>Corresponding Author:</b>                         | Hyun Park<br><br>KOREA, REPUBLIC OF                                                                                                                                                                                                                                                                                                                                                                                                                                                                                                                                                                                                                                                                                                                                                                                                                                                                                                                                                                                                                                                                                                                                                                                                                                                                                                                                            |                 |
| <b>Corresponding Author Secondary Information:</b>   |                                                                                                                                                                                                                                                                                                                                                                                                                                                                                                                                                                                                                                                                                                                                                                                                                                                                                                                                                                                                                                                                                                                                                                                                                                                                                                                                                                                |                 |
| <b>Corresponding Author's Institution:</b>           |                                                                                                                                                                                                                                                                                                                                                                                                                                                                                                                                                                                                                                                                                                                                                                                                                                                                                                                                                                                                                                                                                                                                                                                                                                                                                                                                                                                |                 |
| <b>Corresponding Author's Secondary Institution:</b> |                                                                                                                                                                                                                                                                                                                                                                                                                                                                                                                                                                                                                                                                                                                                                                                                                                                                                                                                                                                                                                                                                                                                                                                                                                                                                                                                                                                |                 |
| <b>First Author:</b>                                 | Bo-Mi Kim                                                                                                                                                                                                                                                                                                                                                                                                                                                                                                                                                                                                                                                                                                                                                                                                                                                                                                                                                                                                                                                                                                                                                                                                                                                                                                                                                                      |                 |
| <b>First Author Secondary Information:</b>           |                                                                                                                                                                                                                                                                                                                                                                                                                                                                                                                                                                                                                                                                                                                                                                                                                                                                                                                                                                                                                                                                                                                                                                                                                                                                                                                                                                                |                 |
| <b>Order of Authors:</b>                             | Bo-Mi Kim                                                                                                                                                                                                                                                                                                                                                                                                                                                                                                                                                                                                                                                                                                                                                                                                                                                                                                                                                                                                                                                                                                                                                                                                                                                                                                                                                                      |                 |
|                                                      | Seunghyun Kang                                                                                                                                                                                                                                                                                                                                                                                                                                                                                                                                                                                                                                                                                                                                                                                                                                                                                                                                                                                                                                                                                                                                                                                                                                                                                                                                                                 |                 |
|                                                      | Do-Hwan Ahn                                                                                                                                                                                                                                                                                                                                                                                                                                                                                                                                                                                                                                                                                                                                                                                                                                                                                                                                                                                                                                                                                                                                                                                                                                                                                                                                                                    |                 |
|                                                      | Seung-Hyun Jung                                                                                                                                                                                                                                                                                                                                                                                                                                                                                                                                                                                                                                                                                                                                                                                                                                                                                                                                                                                                                                                                                                                                                                                                                                                                                                                                                                |                 |
|                                                      | Hwanseok Rhee                                                                                                                                                                                                                                                                                                                                                                                                                                                                                                                                                                                                                                                                                                                                                                                                                                                                                                                                                                                                                                                                                                                                                                                                                                                                                                                                                                  |                 |
|                                                      | Jong Su Yoo                                                                                                                                                                                                                                                                                                                                                                                                                                                                                                                                                                                                                                                                                                                                                                                                                                                                                                                                                                                                                                                                                                                                                                                                                                                                                                                                                                    |                 |
|                                                      | Jong-Eun Lee                                                                                                                                                                                                                                                                                                                                                                                                                                                                                                                                                                                                                                                                                                                                                                                                                                                                                                                                                                                                                                                                                                                                                                                                                                                                                                                                                                   |                 |
|                                                      | SeungJae Lee                                                                                                                                                                                                                                                                                                                                                                                                                                                                                                                                                                                                                                                                                                                                                                                                                                                                                                                                                                                                                                                                                                                                                                                                                                                                                                                                                                   |                 |
|                                                      | Yong-Hee Han                                                                                                                                                                                                                                                                                                                                                                                                                                                                                                                                                                                                                                                                                                                                                                                                                                                                                                                                                                                                                                                                                                                                                                                                                                                                                                                                                                   |                 |
|                                                      | Kyoung-Bin Ryu                                                                                                                                                                                                                                                                                                                                                                                                                                                                                                                                                                                                                                                                                                                                                                                                                                                                                                                                                                                                                                                                                                                                                                                                                                                                                                                                                                 |                 |
|                                                      | Sung-Jin Cho                                                                                                                                                                                                                                                                                                                                                                                                                                                                                                                                                                                                                                                                                                                                                                                                                                                                                                                                                                                                                                                                                                                                                                                                                                                                                                                                                                   |                 |
|                                                      | Hyun Park                                                                                                                                                                                                                                                                                                                                                                                                                                                                                                                                                                                                                                                                                                                                                                                                                                                                                                                                                                                                                                                                                                                                                                                                                                                                                                                                                                      |                 |
|                                                      | Hye Suck An                                                                                                                                                                                                                                                                                                                                                                                                                                                                                                                                                                                                                                                                                                                                                                                                                                                                                                                                                                                                                                                                                                                                                                                                                                                                                                                                                                    |                 |

**Order of Authors Secondary Information:**

**Response to Reviewers:**

From an editorial perspective we also have some requirements. Please include a better picture of the species, and also for QC/validation purposes please include a basic phylogenetic tree (e.g. comparisons with other sequenced Cephalopoda). We also require a statement that you followed ethical norms and had animal research board approval. The points the reviewers have raised regarding reproducibility and data access are very important, so make sure you include all accession numbers, software details (or copy data and custom scripts to GigaDB), and RRIDs:

Response: We add photo of species in Fig 1a. Phylogenetic tree with other sequenced Cephalopoda and mollusks was included in Fig. 2a. And ethic statement, accession numbers and software details version are included in manuscript.

Reviewer reports:

Reviewer #1: This is a nicely written data note describing a very interesting and important genomic resource, the genome of Octopus minor. The data and assembly seem reasonable.

1. Page 3, Line 24: "As advanced invertebrates,"  
> "Advanced" implies that these animals have been evolving longer than other invertebrates. This is not true and this sentence would be improved if this phrase was removed.

Response: As the reviewer suggested, we have corrected the sentence.

2. Page 4, Line 78: "Additionally, chimeras of consensus sequences were removed"  
> This should be explained in more detail.

Response: HQ isoform data generated using TOFU pipeline exists in the form of a chimera-like PCR Chimera. Therefore, an additional removal process is required. This part was removed using the in-house script. We have provided the script in supplementary text.

3. Page 5, Line 110: "standard parameters"  
> Should "standard" parameters be "default" parameters? If so, make that change. If not, list the parameters.

Response: As the reviewer suggested, we have corrected the sentence.

4. To make this work reproducible, all versions of all software and databases used in this study should be listed including (FALCON-Unzip, OrthoMCL, MCL, Gblocks, MAKER, PRANK, TimeTree, RAxML, PAML, Pfam, EggNOG, etc. There are others). Also all command lines should be included as a supplemental file. (See the docx file in the supplement of the following study for an excellent example of best practices in providing a detailed set of command lines:  
<https://academic.oup.com/mbe/article/35/2/486/4644721>

Response: Thank you so much for your valuable suggestions, we have made a extra supplementary note describing all the commands used for genome analysis processes.

5. Page 5, Line 113: "202 1:1:1 single-copy orthologous genes"  
> It's confusing (and unnecessary) to label single-copy orthologs as "1:1:1 single-copy orthologs" when dealing with orthologs from 14 species. It would make sense with 3 species, but with 14 it would be 1:1:1:1:1:1:1:1:1:1:1:1:1:1:1:1, which would be a bit much.

Response: As the reviewer suggested, we have corrected the sentence.

6. Page 5, Line 115: "Gblock"

> Gblocks

Response: As the reviewer suggested, we have corrected the sentence.

7. Page 6, Line 130: "A statistical analysis of the changes in gene family sizes indicated significantly greater gene family expansion in *O. minor* (178 gene families) compared to other species"

> What is the statistical test? What is the P-value? What is considered significant (e.g.  $P < 0.5$ )? How are gene families defined? Compared to which species? Does this mean that 178 gene families are expanded?

Response: Sorry for the confusion. All the results are describing about gene loss-gain analysis. To make it clear, we have corrected the sentence and have added p-value cut off used for CAFÉ analysis.

> Assemblies of PacBio sequence data (including those done by Falcon Unzip) suffer from the inclusion of multiple haplotigs per genomic locus. What tests have been done to be control for this? How do the authors know that the expansion of gene families is not artifactual due to haplotigs?

Response: We performed gene family analysis using only the primary assembly in assembly results generated by Falcon-unzip. Therefore, we do not expect any analysis error due to haplotigs interference.

Page 6, Line 148: "The larger gene size"

> I think the authors mean "larger number of genes." "Larger gene size" seems to refer to the number of nucleotides in genes.

Response: As the reviewer suggested, we have corrected the sentence.

Page 6, Line 142: "of repetitive sequences (44.43%)—"Repeats accounted for 44%"

> Remove one of these 44% --- It's repetitive.

Response: As the reviewer suggested, we have removed that part.

Page 6, Line 142: "Repeats accounted for 44% (2.262 Gb) of the assembly, and were dominated by simple repeats (14.7%) and TEs"

> It's unclear whether 14.7% refers to the 14.7% of the genome or 14.7% of the repeats. Be explicit.

> Also, this paragraph would benefit by a side-by-side comparison of repeats and genes between the two Octopus. E.g. "*O. minor* genome is composed of 44% repeats and X% gene coding sequence, while *O. maculoides* genome consists of X% repeats and X% gene coding sequence." This could be helped by a table showing side-by-side values. As it is written it is difficult to get a feel for how the content of these genomes compare. I would also wait to talk about TEs, transposons, and LINES until the next paragraph.

Response: We are sorry for not organized sentences. As the reviewer suggested, we have made clear the sentences describing brief differences of genome characteristics between *O. minor* and *O. bimaculoides*.

Page 6, Line 151: "TEs are crucial components"

> I would argue that since TEs are absent from some animal genomes, they are not "crucial." I suggest removing "crucial". Minor point.

Response: As the reviewer suggested, we have corrected the sentence.

BUSCO: Busco scores should be reported in the paper rather than in the FTP site. This should include: Total number of core genes queried, Number of core genes detected—Complete, Number of core genes detected—Complete + Partial, Number of missing core genes, Average number of orthologs per core genes, % of detected core genes that have more than 1 ortholog

Response: Thank you for your suggestions. We have moved the supplementary table 2 describing BUSCO results to main table 1.

Reviewer #2: In the present manuscript, the authors provide the genome of the common long-arm octopus *Octopus minor*. It has been reported that the genome of the California two-spot octopus *O. bimaculoides* has a high amount of repeat content and several gene family expansions related to its morphological novelty. *O. minor* is closely related to *O. bimaculoides*, belonging to the same genus. The authors compared gene families and repetitive elements of these two octopus genomes with other lophotrochozoans and concluded that these two octopus genomes seem to be evolved independently.

Overall, this is a significant contribution to the field of cephalopod genomics. In order to support their hypothesis, the authors should address the issue of phylogenetic analyses of major gene families and repeats before publication.

Major comments:

1. The manuscript is well-written and straightforward. However, I find that there is a lack of evidence to show which events are related to *Octopus* genus-specific events or those of species-specific. Since one major conclusion from gene family and repeat analyses is that *O. minor* and *O. bimaculoides* evolved independently, the authors should provide evidence to test their hypothesis. For example, one major finding in the *O. bimaculoides* genome is that gene family expansions of protocadherins and the C2H2 superfamily of zinc-finger genes. Given that we have an additional genome from the same genus, the authors should provide gene trees to show that if these gene family expansions are general to the genus *Octopus*, or there was a convergent evolution in which these gene family expanded independently.

Response: Thank you for the positive comment on our manuscript. Based on the reviewer's comment, we analyzed genomic expansions of protocadherins and C2H2 zinc finger gene family from the *O. minor* genome. In the case of squid, there is no genome information available yet. However, from the transcriptome data, only small numbers of protocadherins and C2H2 zinc finger gene family were identified in squid (Albertin et al., 2015). Moreover, Albertin et al. (2015) measured that octopus protocadherins appear to have expanded ~135 Mya after octopuses diverged from squid. In our study, we estimated that *O. minor* was diverged from *O. bimaculoides*. Thus, we assume that the extraordinary expansions of both gene families are *Octopus*-specific. Sentences incorporated in the revised manuscript are appended as follows;

Previously, 168 protocadherin (*pcdhs*) genes were annotated in the genome of *O. bimaculoides*, which is the largest number among sequenced metazoan genomes (Figure S8.3.2 in Albertin et al., 2015). In the case of C2H2 zinc finger gene family, approximately 1,800 C2H2 genes were annotated in the *O. bimaculoides* genome. The drastic expansions were also observed in the genome of *O. minor*, as 303 and 2,289 genes were annotated for *pcdhs* and C2H2 zinc finger gene family, respectively. We assume that the expansion patterns are unique to the genus *Octopus*, as the expansion pattern was not detected in squid and the *pcdhs* seem to have expanded after octopuses diverged from squid ( $\approx 135$  Mya) (Albertin et al., 2015). Since we estimated that *O. minor* diverged from the genus *Octopus*, the extraordinary expansions of both gene families are presumably *Octopus*-specific.

2. Also, it is worth to check the genomic organization of these gene family expansions in two octopus genomes. Are they usually expanded in a tandemly duplicated manner

on the same scaffold? Or are they distributed among different scaffolds?

Response: Thank you so much for your informative comments. Unfortunately, we have needed to reduce biological analysis part to follow data note author guidelines. Following your valuable suggestions, we are going to analysis gene family organizations in our future study.

3. Similar situation for the repetitive elements, although the authors showed that the repeat landscape is different between two octopus genomes, there is no information about which repeat expansions have happened at the genus-level and which are at the species-level. The authors should at least examine some representative repetitive elements in details by providing their phylogenetic analysis with repeat trees.

Response: Similar with the previous response, we had to reduced the analysis part. Thank you so much for your suggestions.

4. In addition, the authors mentioned that they did RNA-seq of 13 tissues, but there is no description of this dataset. Are there some gene family expansions related to tissue-specific expression? The authors should provide some results from their RNA-seq data.

Response: Like previous response, we had to reduce the biological analysis part. In this manuscript, we have used RNA-seq data to annotate genes. We are going to analysis tissue-specific RNA expression patterns in the near future.

Minor comments:

1. Introduction: Given that octopuses are members of lophotrochozoans and the authors also used a lot of lophotrochozoan genomes for comparisons, the authors should properly describe previous work related to this topic. I would suggest the authors add some description about the relationship of molluscs and other lophotrochozoans and cite major papers to give an overview for the rationale of phylogenetic and gene analyses.

References:

Takeuchi et al. (2012) Draft genome of the pearl oyster *Pinctada fucata*: a platform for understanding bivalve biology. *DNA Res* 19, 117-30.

Zhang et al. (2012) The oyster genome reveals stress adaptation and complexity of shell formation. *Nature* 490, 49-54.

Simakov et al. (2013) Insights into bilaterian evolution from three spiralian genomes. *Nature* 493, 526-31.

Luo et al. (2015) The *Lingula* genome provides insights into brachiopod evolution and the origin of phosphate biomineralization. *Nat Commun* 6, 8301.

Response: Thank you so much for your suggestion and references. We have added introductory sentence about genome information scarcity of mollusk and their relationship with lophotrochozoans.

2. Line 12: "bilaterian animal species" -> "bilaterian species". Bilaterians are bilaterally symmetric animals, so using "bilaterian animal" would be redundant.

Response: As the reviewer suggested, we have corrected the sentence.

3. Line 40: Most *O. minor* habitats are "mud and sand"...

Response: As the reviewer suggested, we have corrected the sentence.

4. Line 42: The following sentence is unrelated to the scientific study, especially for the later part: "As an important economic cephalopod in South Korea, fishermen normally catch *O. minor* by digging a hole in the mudflat with shovels."

Response: As the reviewer suggested, we have corrected the sentence.

5. The Results section (or Analyses) "Genome sequencing and annotation" looks like

|                                                                                                                                                                                                                                                                                                                                                                                   |                                                                                                                                                                                                                                                                                                                                                                                                                                                                                                                                                                                                                                                                                                                                                                                                                                                                                                                                                                                                                                                                                  |
|-----------------------------------------------------------------------------------------------------------------------------------------------------------------------------------------------------------------------------------------------------------------------------------------------------------------------------------------------------------------------------------|----------------------------------------------------------------------------------------------------------------------------------------------------------------------------------------------------------------------------------------------------------------------------------------------------------------------------------------------------------------------------------------------------------------------------------------------------------------------------------------------------------------------------------------------------------------------------------------------------------------------------------------------------------------------------------------------------------------------------------------------------------------------------------------------------------------------------------------------------------------------------------------------------------------------------------------------------------------------------------------------------------------------------------------------------------------------------------|
|                                                                                                                                                                                                                                                                                                                                                                                   | <p>for the Methods section. Should that be called "Data description" in GigaScience format?</p> <p>Response: As the reviewer suggested, we have corrected the sentence.</p> <p>6. Line 61: The authors should describe the strategy and sequencing platform they used. It is mentioned in the RNA part at line 73 but not for DNA. Did authors use the same strategy here?</p> <p>Response: As the reviewer suggested, we have corrected the sentence.</p> <p>7. Line 64: What kinds of paired-end sequences were used?</p> <p>Response: As the reviewer suggested, we have corrected the sentence.</p> <p>8. Line 69: thirteen -&gt; "13".</p> <p>Response: As the reviewer suggested, we have corrected the sentence.</p> <p>9. Line 72: Remove "TM".</p> <p>Response: As the reviewer suggested, we have corrected the sentence.</p> <p>10. Line 73: Pacbio -&gt; "PacBio".</p> <p>Response: As the reviewer suggested, we have corrected the sentence.</p> <p>11. Line 124: O. bimaculoides.</p> <p>Response: As the reviewer suggested, we have corrected the sentence.</p> |
| <b>Additional Information:</b>                                                                                                                                                                                                                                                                                                                                                    |                                                                                                                                                                                                                                                                                                                                                                                                                                                                                                                                                                                                                                                                                                                                                                                                                                                                                                                                                                                                                                                                                  |
| <b>Question</b>                                                                                                                                                                                                                                                                                                                                                                   | <b>Response</b>                                                                                                                                                                                                                                                                                                                                                                                                                                                                                                                                                                                                                                                                                                                                                                                                                                                                                                                                                                                                                                                                  |
| Are you submitting this manuscript to a special series or article collection?                                                                                                                                                                                                                                                                                                     | No                                                                                                                                                                                                                                                                                                                                                                                                                                                                                                                                                                                                                                                                                                                                                                                                                                                                                                                                                                                                                                                                               |
| <b>Experimental design and statistics</b>                                                                                                                                                                                                                                                                                                                                         | Yes                                                                                                                                                                                                                                                                                                                                                                                                                                                                                                                                                                                                                                                                                                                                                                                                                                                                                                                                                                                                                                                                              |
| <p>Full details of the experimental design and statistical methods used should be given in the Methods section, as detailed in our <a href="#">Minimum Standards Reporting Checklist</a>. Information essential to interpreting the data presented should be made available in the figure legends.</p> <p>Have you included all the information requested in your manuscript?</p> |                                                                                                                                                                                                                                                                                                                                                                                                                                                                                                                                                                                                                                                                                                                                                                                                                                                                                                                                                                                                                                                                                  |
| <b>Resources</b>                                                                                                                                                                                                                                                                                                                                                                  | Yes                                                                                                                                                                                                                                                                                                                                                                                                                                                                                                                                                                                                                                                                                                                                                                                                                                                                                                                                                                                                                                                                              |
| A description of all resources used, including antibodies, cell lines, animals and software tools, with enough information to allow them to be uniquely                                                                                                                                                                                                                           |                                                                                                                                                                                                                                                                                                                                                                                                                                                                                                                                                                                                                                                                                                                                                                                                                                                                                                                                                                                                                                                                                  |

|                                                                                                                                                                                                                                                                                                                                                                                                                                                                                                                                                         |            |
|---------------------------------------------------------------------------------------------------------------------------------------------------------------------------------------------------------------------------------------------------------------------------------------------------------------------------------------------------------------------------------------------------------------------------------------------------------------------------------------------------------------------------------------------------------|------------|
| <p>identified, should be included in the Methods section. Authors are strongly encouraged to cite <a href="#">Research Resource Identifiers</a> (RRIDs) for antibodies, model organisms and tools, where possible.</p> <p>Have you included the information requested as detailed in our <a href="#">Minimum Standards Reporting Checklist</a>?</p>                                                                                                                                                                                                     |            |
| <p><b>Availability of data and materials</b></p> <p>All datasets and code on which the conclusions of the paper rely must be either included in your submission or deposited in <a href="#">publicly available repositories</a> (where available and ethically appropriate), referencing such data using a unique identifier in the references and in the “Availability of Data and Materials” section of your manuscript.</p> <p>Have you have met the above requirement as detailed in our <a href="#">Minimum Standards Reporting Checklist</a>?</p> | <p>Yes</p> |

[Click here to view linked References](#)

# The genome of common long-arm octopus *Octopus minor*

Bo-Mi Kim <sup>a,†</sup>, Seunghyun Kang <sup>a,†</sup>, Do-Hwan Ahn <sup>a,†</sup>, Seung-Hyun Jung <sup>b,†</sup>, Hwanseok Rhee <sup>c,†</sup>, Jong Su Yoo <sup>b</sup>, Jong-Eun Lee <sup>c</sup>, SeungJae Lee <sup>c</sup>, Yong-Hee Han <sup>d</sup>, Kyoung-Bin Ryu <sup>d</sup>, Sung-Jin Cho <sup>d,\*</sup>, Hyun Park <sup>a,e,\*</sup>, Hye Suck An <sup>b,\*</sup>

## Affiliations

<sup>a</sup> Unit of Polar Genomics, Korea Polar Research Institute(KOPRI), Incheon 21990, Korea

<sup>b</sup> Department of Genetic Resources Research, National Marine Biodiversity Institute of Korea (MABIK), Janghang-eup, Seochun-gun, Chungchungnam-do 33662, Korea

<sup>c</sup> Genomics Lab, Cluster Center, DNA Link, Inc., 150, Bugahyeon-ro, Seodaemun-gu, Seoul 03759, Korea

<sup>d</sup> School of Biological Sciences, College of Natural Sciences, Chungbuk National University, Cheongju, Chungbuk 28644, Korea

<sup>e</sup> Polar Sciences, University of Science & Technology, Yuseong-gu, Daejeon 34113, Korea

---

\*Co-corresponding author:

School of Biological Sciences, College of Natural Sciences, Chungbuk National University, Cheongju, Chungbuk 28644, Korea; E-mail address: sjchobio@chungbuk.ac.kr (S. Cho)

Unit of Polar Genomics, Korea Polar Research Institute, Incheon 21990, Korea; E-mail address: hpark@kopri.re.kr (H. Park)

Department of Genetic Resources Research, National Marine Biodiversity Institute of Korea (MABIK), Janghang-eup, Seochun-gun, Chungchungnam-do 33662, Korea; E-mail address: mgran@mabik.re.kr H.S. An)

<sup>†</sup>These authors contributed equally to this work.



1 **Abstract**

2  
3 **Background:** The common long-arm octopus (*Octopus minor*) is found in mudflats of subtidal  
4 zones and faces numerous environmental challenges. The ability to adapt its morphology and  
5 behavioural repertoire to diverse environmental conditions makes the species a promising  
6 model to understand genomic adaptation and evolution in cephalopods. **Findings:** The final  
7 genome assembly of *O. minor* is 5.09 Gb, with a contig N50 size of 197 kb and longest size of  
8 3.027 Mb, from a total of 419 Gb raw reads generated using PacBio RS II platform. We  
9 identified 30,010 genes and 44.43% of the genome is composed of repeat elements. The  
10 genome-wide phylogenetic tree indicated the divergence time between *O. minor* and *O.*  
11 *bimaculoides* was estimated to be 43 million years ago (Mya) based on single-copy orthologous  
12 genes. In total, 178 gene families are expanded in *O. minor* in the 14 **bilaterian species**.  
13 **Conclusion:** We found that the *O. minor* genome was larger than that of closely related *O.*  
14 *bimaculoides*, and this difference could be explained by enlarged introns and recently  
15 diversified transposable elements. The high-quality *O. minor* genome assembly provides a  
16 valuable resource for understanding octopus genome evolution and the molecular basis of  
17 adaptations to mudflats.

18  
19 **Key words:**

20 Octopus genome, Cephalopods, adaptation and evolution, long-read sequencing

## Background

Cephalopods (*e.g.* cuttlefish, nautilus, octopus, and squid) belong to the phylum Mollusca, which is one of the most diverse phylum within Lophotrochozoa. Regardless of their evolutionary, biological and economic significance, their genome information is still limited to a few species[1,2,3,4].

Cephalopods have interesting biological characteristics, such as an extraordinary life-history plasticity, rapid growth, short lifespan, large brain, and sophisticated sense organs with a complex nervous system[5]. The ability to adapt their morphology and behavioural repertoire to diverse environmental conditions and capacity for learning and memory are common traits in cephalopods, but have rarely been observed in other invertebrates[6]. Many cephalopod species have been considered for fisheries and are promising candidates for aquaculture. There are an estimated 1,000 cephalopod species (~700 known marine-living species), and octopods are among the most well-known representatives of the class, including over 150 species worldwide[7]. Studies have evaluated the biological machinery underlying the fundamental nervous system functions, strong behavioural plasticity, and learning ability in octopods[8, 9].

*Octopus minor* (Sasaki, 1920), also known as the common long-arm octopus, is a benthic littoral species, and is a major commercial fishery product with a high annual yield[10]. *O. minor* is relatively small and possesses a shorter life cycle (approximately 1 year), thinner arms, and a lower ratio between head size and arm length compared to those of other octopus species (**Fig. 1a and 1b**). The species is widely distributed in Northeast Asia, particularly in coastal regions of South Korea, China, and Japan (**Fig. 1c**). Most *O. minor* habitats are **mud and mud-sand** in well-developed mudflats of coastal regions; they spawn in holes on the mudflat by digging with the whole body. Thus, they are subjected to the harsh environmental conditions of mudflats, including diurnal temperature changes, steep salinity and pH gradients, desiccation, wave action and tides, oxygen availability, and interrupted feeding. Owing to the ability of *O. minor* to tolerate environmental fluctuations, it is a promising organism for studies of the molecular basis of plasticity and mechanisms underlying adaptation to harsh environmental conditions, although relevant information is scarce. To make full use of this emerging cephalopod model system and to understand the interesting features of *O. minor*, including its plasticity in mudflats and genetic evolution, a high-quality reference genome is required.

The published genome and multiple transcriptomes of the California two-spot octopus *Octopus bimaculoides* have provided valuable information on genomic traits (*e.g.* gene family

1 55 expansion, genome rearrangements, and transposable element activity) related to the evolution  
2 56 of neural complexity and morphological innovations[3]. In this study, we report a high-quality  
3 57 genome assembly and annotation for *O. minor*. We compare the genomes of *O. minor* and *O.*  
4 58 *bimaculoides* and provide evidence that the expansion of genes and/or gene families is related  
5 59 to adaptation to the harsh environmental conditions of mudflats.  
6  
7  
8  
9

## 10 60

### 11 61 **Data description**

#### 12 62 **Genome sequencing and annotation**

13 63 *O. minor* genomic DNA was extracted from leg muscle tissues. The average coverage of  
14 64 SMRT sequences was ~76-fold using P6-C4 sequence chemistry from genomic DNA libraries  
15 65 **which was sequenced by PacBio RS II**. The average subread length was 9.2 kb (Supplementary  
16 66 Table S1). For genome size estimation, a k-mer analysis was performed using Jellyfish ver.  
17 67 2.1.3[11] with paired-end sequences of the genomic DNA libraries. The *O. minor* genome was  
18 68 estimated to be 5.1 Gb (Supplementary Figs. S1 and S2). The *de novo* assembly generated  
19 69 using FALCON-Unzip assembler ver. 0.4 was 5.09 Gb with 41,584 contigs[12]. Finally,  
20 70 evaluation of the genome completeness was checked using BUSCO ver. 1.22[13] (**Table 1**).  
21  
22  
23  
24  
25  
26  
27  
28  
29

30 71 Total RNA was extracted from **13** tissues (brain, branchial heart, buccal mass, eye, heart,  
31 72 kidney, liver, ovary, poison gland, siphon, skin, and suckers) using the RNeasy Mini Kit  
32 73 (Qiagen, Hilden, Germany) according to the manufacturer's instructions. RNA quality was  
33 74 confirmed using an Agilent Bioanalyzer. Isoform sequencing was performed using pooled  
34 75 RNA from thirteen organs. Library construction and sequencing were performed using **PacBio**  
35 76 **RS II** (Supplementary Table S2). The SMRTbell library for Iso-seq was sequenced using 16  
36 77 SMRT cells (1–2 kb, three cells; 2–3 kb, six cells; and 3–6 kb, seven cells). Reads were  
37 78 identified using the SMRT Analysis ver. 2.3 RS\_IsoSeq.1 classification protocol. All full-  
38 79 length reads derived from the same isoform were clustered and consensus sequences were  
39 80 polished using the TOFU pipeline (isoseq-tofu)[14]. **Additionally, chimeras of consensus**  
40 81 **sequences generated during experiments and TOFU pipeline were removed using in-house**  
41 82 **script.**  
42  
43  
44  
45  
46  
47  
48  
49  
50  
51

52 83 MAKER ver. 2.28 was used for genome annotation[15]. First, repetitive elements were  
53 84 identified using RepeatMasker **ver. 4.0.7**[16]. A *de novo* repeat library was constructed using  
54 85 RepeatModeler **ver. 1.0.3**[17], including RECON **ver. 1.08**[18] and RepeatScout **ver. 1.0.5**[19],  
55 86 with default parameters. Consensus sequences and classification information for each repeat  
56 87 family were generated, and tandem repeats, including simple repeats, satellites, and low-  
57  
58  
59  
60  
61  
62  
63  
64  
65

1 88 complexity repeats, were predicted using Tandem Repeats Finder[14]. This masked genome  
2  
3 89 sequence was used for *ab initio* gene prediction with SNAP software[20]; subsequently,  
4  
5 90 alignments of expressed sequence tags with BLASTn ver. 2.2.28+ and protein information  
6  
7 91 from tBLASTx ver. 2.2.28+ were included. The *de novo* repeat library of *O. minor* from  
8  
9 92 RepeatModeler was used for RepeatMasker; proteins from sequenced molluscs (*L. gigantea*,  
10  
11 93 *C. gigas*, and *Aplysia californica*) and an octopus species (*O. bimaculoides*) were included in  
12  
13 94 the analysis. Transcriptome assembly results were used for expressed sequence tags. Next,  
14  
15 95 MAKER polished the alignments using Exonerate, which provided integrated information for  
16  
17 96 SNAP annotation. Using MAKER, the final gene model was selected and revised considering  
18  
19 97 all information. A total of 30,010 *O. minor* genes were predicted using MAKER. The Infernal  
20  
21 98 software package (ver. 1.1)[21] and covariance models from the Rfam[22] database were used  
22  
23 100 to identify other non-coding RNAs in the *O. minor* scaffold. Putative tRNA genes were  
24  
25 101 identified using tRNAscan-SE ver. 1.4[23]. tRNAscan-SE uses a covariance model that scores  
26  
27 102 candidates based on their sequence and predicted secondary structures.

28  
29 103 The mean size of *O. minor* genes was 23.6 kb, with an average intron length of 5.4 kb (4.2  
30  
31 104 introns per gene) (Supplementary Table S3). The *O. minor* genome contained 30,010 protein-  
32  
33 105 coding genes (Table 2), of which 96% were annotated based on known proteins in public  
34  
35 106 databases, and 79% were similar to *O. bimaculoides* genes (Supplementary Table S4).

### 36 107 **Comparative genomic analyses and duplicate genes**

37  
38 108 To resolve gene family evolution in the *O. minor* genome, we classified orthologous gene  
39  
40 109 clusters (Supplementary Table S5) from 14 species and found evidence for the recent expansion  
41  
42 110 of low-copy gene duplicates and the expansion of large gene families. Orthologous groups were  
43  
44 111 identified using both OrthoMCL ver. 2.0.9 [24] and Pfam[25] domain assignments. OrthoMCL  
45  
46 112 generated a graphical representation of sequence relationships, which was then divided into  
47  
48 113 subgraphs using the Markov Clustering Algorithm (MCL) from multiple eukaryotic  
49  
50 114 genomes[24]. The default parameters and options of OrthoMCL were used for all steps,  
51  
52 115 together with the genomes of 14 species (Supplementary Table S5). For *O. minor*, the coding  
53  
54 116 sequence from the MAKER annotation pipeline was used. To construct a phylogenetic tree and  
55  
56 117 estimate the divergence time, 202 1:1 single-copy orthologous genes were used. Using the  
57  
58 118 Probabilistic Alignment Kit (PRANK) ver.140603 [26], protein-coding genes were aligned  
59  
60 120 with the codon alignment option, and poorly aligned regions with gaps were eliminated using  
61  
62  
63  
64  
65

1 121 RAxML ver. 8.2.4[28] with 1,000 bootstrap replicates, and the divergence time was calibrated  
2  
3 122 using TimeTree[29]. The average gene gain-loss was identified using CAFÉ ver. 4.0[30] with  
4  
5 123 *p*-value < 0.05.

6  
7 124 Sequence divergence was estimated by calculating  $d_s$  values using the yn00 program from  
8  
9 125 the PAML package ver. 4.7a[31]. The Jukes–Cantor distances were adjusted using the Jukes–  
10 126 Cantor formula  $d_{XY} = -(3/4)\ln(1-4/3D)$ , where D is the proportion of nucleotide differences  
11  
12 127 between the sequences. The time estimation was calibrated by assuming  $d_s$  of ~1 is 135 million  
13  
14 128 years[7].

15  
16 129 Gene family analyses of specific genes of interest were manually curated using manual  
17  
18 130 gene search methods. Gene or gene family targets identified in the genomes of *O. bimaculoides*,  
19 131 *Crassostrea gigas*, *Lottia gigantea*, *Capitella teleta*, and *Homo sapiens* were directly mapped  
20  
21 132 to the *O. minor* genome database by a local BLAST analysis. Alignments were generated using  
22  
23 133 Clustal Omega (ClustalO) ver. 1.2.4[32] and Multiple Sequence Comparison by Log-  
24  
25 134 Expectation (MUSCLE) ver. 3.8.31[33], and phylogenetic trees were built using FastTree[34]  
26  
27 135 or RAxML with 1,000 bootstrap replicates.

28  
29 136 **Gene gain-loss analysis indicated** significantly greater gene family expansion in *O. minor*  
30 137 (178 gene families) compared to other species, *e.g.* interleukin-17, G protein-coupled receptor  
31  
32 138 (GPCR) proteins, Zinc-finger of C2H2 type, heat shock protein (HSP) 70 proteins, and  
33  
34 139 cadherin-like domains (Supplementary Tables S6–S8). The divergence time between *O. minor*  
35  
36 140 and *O. bimaculoides* was estimated to be 43 million years ago (Mya) based on single-copy  
37  
38 141 orthologous genes (Fig. 2a) Further, Pfam domain and EggNOG metazoan database searches  
39  
40 142 consistently showed the expansion of gene families, including the cadherin and protocadherin  
41  
42 143 domains and interleukin-17 (Fig. 2b and Supplementary Tables S9 and S10).

43 144 **Previously, 168 protocadherin (*pcdhs*) genes were annotated in the genome of *O.***  
44  
45 145 ***bimaculoides*, which is the largest number among sequenced metazoan genomes[3]. In the case**  
46  
47 146 **of C2H2 zinc finger gene family, approximately 1,800 C2H2 genes were annotated in the *O.***  
48  
49 147 ***bimaculoides* genome. The drastic expansions were also observed in the genome of *O. minor*,**  
50  
51 148 **as 303 and 2,289 genes were annotated for *pcdhs* and C2H2 zinc finger gene family,**  
52  
53 149 **respectively. We assume that the expansion patterns are unique to the genus *Octopus*, as the**  
54  
55 150 **expansion pattern was not detected in squid and the *pcdhs* seem to have expanded after**  
56  
57 151 **octopuses diverged from squid ( $\approx$  135 Mya)[3]. Since we estimated that *O. minor* diverged**  
58  
59 152 **from the genus *Octopus*, the extraordinary expansions of both gene families are presumably**  
60  
61 153 ***Octopus*-specific.**

## Transposable element annotation and expansions

The *O. minor* genome (5.1 Gb) is composed of 44 % repetitive sequences and 0.68 % coding sequences, while *O. bimaculoides* genome (2.7 Gb) made up of 35% repetitive sequences and 1.08 % coding sequences. Repeats were dominated by simple repeats (14.7% of genome) and TEs, especially DNA transposons and long interspersed elements (LINEs), which were more abundant in the *O. minor* genome than in the *O. bimaculoides* genome (Supplementary Tables S11–S13). In an analysis of genes (i.e. exons and introns) and intergenic sequences, TEs were highly distributed in the intergenic sequence regions in both species (Supplementary Fig. S4). In particular, TE accumulation in intergenic sequence regions was significantly greater in *O. minor* than in *O. bimaculoides*. The larger number of gene size and higher repeat content may explain the larger genome of *O. minor* compared with *O. bimaculoides*.

TEs are components of animal genomes, with major roles in genome rearrangements and evolution. Based on the mechanism of transposition, TEs are grouped into two main classes, class I retrotransposons, which are subdivided into long terminal repeats (LTRs) and non-LTR retrotransposons [*e.g.* LINEs and short interspersed elements (SINEs)], and class II DNA transposons[35]. We detected more TEs in the larger genome of *O. minor* than in the smaller genome of *O. bimaculoides*. Approximately half of the *O. minor* genome was composed of TEs (11,547,325 TEs; 44% of the genome), while one-third of the *O. bimaculoides* genome was composed of TEs (3,887,025 TEs; 35%) (Supplementary Table S11). The majority of class I retrotransposons in the *O. minor* genome were LINEs (10%), as was also the case in *O. bimaculoides* (9%), and the proportion of DNA transposons in *O. minor* (13%) was comparable to that in *O. bimaculoides* (12%). Interestingly, the *O. minor* genome had fewer SINEs (1,540 copies; 0.01%) and more rolling-circle (RC)-Helitrons (121,101 copies; 3.7%) than the *O. bimaculoides* genome (SINEs: 115,169 copies, 1.8%; RC-Helitron: 43,735 copies, 0.7%). A Kimura distance analysis revealed that the most frequent TE sequence divergence relative to the TE consensus sequence was ~7–10%, with an additional peak at 3% (Fig. 3a), compared to 16–17% in the *O. bimaculoides* genome (Fig. 3b and Supplementary Table S11).

A more recent expansion of LINEs, without an increase in SINEs, was detected in the *O. minor* genome, while ancient copies of all four types of TEs and an ancient transposition burst of DNA transposons were observed in *O. bimaculoides*. Using the recent TE expansion in the *O. minor* genome, we correlated Jukes–Cantor distance measures with  $d_s$  and identified two

1 187 unique expansion waves at 0.04 and 0.09 compared to the distribution of *O. bimaculoides* TEs  
2  
3 188 (Supplementary Figs. S5 and S6). This suggests that a major expansion of TEs in the *O. minor*  
4  
5 189 genome occurred 11 to 25 Mya, which is after the divergence of *O. minor* and *O. bimaculoides*.  
6  
7 190

## 8 191 **Conclusions**

10 192 *O. minor* has developed morphological and physiological adaptations to match their unique  
11  
12 193 mudflat habitats. In summary, we generated a high-quality sequence assembly for *O. minor* to  
13  
14 194 elucidate the molecular mechanisms underlying their adaptations. In a direct comparison  
15  
16 195 between the genomes of *O. minor* and *O. bimaculoides*, we discovered that they evolved  
17  
18 196 recently and independently from the octopus lineage during the successful transition from an  
19  
20 197 aquatic habitat to mudflats. We also found evidence suggesting that speciation in the genus  
21  
22 198 *Octopus* is closely related to the gene family expansion associated with environmental  
23  
24 199 adaptation. Finally, in addition to providing insights into the genome size increase via gene  
25  
26 200 family expansion, the *O. minor* genome sequence also provides an essential resource for studies  
27  
28 201 of Cephalopoda evolution.  
29  
30 202

## 31 203 **Availability of supporting data**

32 204 The octopus (*O. minor*) genome project was deposited at NCBI under BioProject number  
33  
34 205 PRJNA421033. The whole-genome sequence was deposited in the Sequence Read Archive  
35  
36 206 (SRA) database under accession number SRX3462978, and isoform sequence from PacBio  
37  
38 207 sequencing data were deposited in the SRA database under accession numbers SRX3478495  
39  
40 208 and SRX3478496. Other supporting data, including annotations, alignments, and BUSCO  
41  
42 209 results, are available in the GigaScience repository, GigaDB [---].  
43  
44 210

## 45 211 **Ethics Statement**

47 212 No specific permits were required for the described field studies, no specific permissions  
48  
49 213 were required for these locations/activities and the field studies did not involve endangered or  
50  
51 214 protected species.  
52  
53 215

## 54 216 **Additional files**

56 217 Fig. S1. Estimation of genome size of *O. minor* based on distribution of 17 k-mer frequency  
58  
59 218 in raw sequencing reads.

1 219 Fig. S2. Genome size determination by flow cytometry. The flow cytometry analysis  
2  
3 220 provides as estimation of Propidium iodide (PI) staining. Accepting a haploid genome  
4  
5 221 size estimate of 2.81 Gb for Mouse (Assembly; GRCm38.p6), we estimate the genome  
6  
7 222 size of *O. minor* to be 5.38 Gb.

8 223 Fig. S3. Blast top hit distribution.  
9

10 224 Fig. S4. Composition of transposable elements in the regions of gene and intergenic  
11  
12 225 sequence.

13  
14 226 Fig. S5. Transposable elements Juke-cantor distance distribution.

15  
16 227 Fig. S6. Transposable elements Juke-cantor distance distribution of *O. minor*.

17  
18 228 Table S1. Statistics for SMRT sequencing for the *O. minor* genome sequencing.

19 229 Table S2. Isoform sequencing summary of transcriptome analysis of *O. minor* using PacBio  
20  
21 230 RSII.

22  
23 231 Table S3. Brief summary of gene statistics.

24  
25 232 Table S4. Functional annotation statistics of transcriptome assembly.

26  
27 233 Table S5. Summary of orthologous gene clusters analyzed in 14 species.

28  
29 234 Table S6. CAFÉ gene family analysis results.

30  
31 235 Table S7. Example of top 30 CAFÉ significantly expanded gene families.

32  
33 236 Table S8. Example of top 30 CAFÉ significantly shrunked gene families.

34  
35 237 Table S9. Top 30 expanded Pfam domains.

36  
37 238 Table S10. Top 30 expanded EggNOG domains.

38  
39 239 Table S11. Statistics of repeat analysis of the *O. minor* genome.

40  
41 240 Table S12. Classifications and frequencies of transposable elements and other repeats.

42  
43 241 Table S13. Classifications and frequencies of simple repeats.

44  
45 242 **Supplementary text commands**  
46

## 47 244 **Acknowledgements**

48  
49 245 We thank Jong Won Han and Ha Yeun Song of the National Marine Biodiversity Institute of  
50  
51 246 Korea (MABIK) for the sampling of 18 tissues used for transcriptome assembly, as well as  
52  
53 247 Keekwang Kim of Chungnam National University and Kun-Hee Kim of Chonnam National  
54  
55 248 University for their devotion to estimate the genome size of *O. minor* by flow cytometry. We  
56  
57 249 also thank Jeollanam-Do Oceans & Fisheries Science Institute for providing octopus embryos.  
58

## 59 60 251 **Funding**



1 252 This work was supported by grants (2018M00900) from MABIK.

## 3 253 4 5 254 **Competing interests**

6  
7 255 The authors declare that they have no competing interests.

## 8 9 256 10 11 257 **Author contributions**

12 258 H.S.A., H.P., and J.L. conceived the study. H.P., B.K., S.K., D.A., S.J., J.L., H.R., and S.L.  
13 259 performed genome sequencing, assembly, and annotation. S.J., Y.H., K.R., and S.C. performed  
14 260 experiments. J.S.Y., H.S.A., H.P., S.J., and J.L. advised and coordinated the study. B.K., S.K.,  
15 261 D.A., and H.P. mainly wrote the paper. All authors contributed to writing and editing the  
16 262 manuscript and supplementary information and producing the figures.  
17  
18  
19  
20  
21  
22

## 23 263 24 264 **References**

- 25 265  
26 266  
27 267  
28 268 1. Takeuchi T, Kawashima T, Koyanagi R, Gyoja F, Tanaka M, Ikuta T, et al. Draft  
29 269 genome of the pearl oyster *Pinctada fucata*: a platform for understanding bivalve  
30 270 biology. *DNA research*. 2012;dss005.
- 31 271 2. Zhang G, Fang X, Guo X, Li L, Luo R, Xu F, et al. The oyster genome reveals stress  
32 272 adaptation and complexity of shell formation. *Nature*. 2012;490 7418:49.
- 33 273 3. Albertin CB, Simakov O, Mitros T, Wang ZY, Pungor JR, Edsinger-Gonzales E, et al.  
34 274 The octopus genome and the evolution of cephalopod neural and morphological  
35 275 novelties. *Nature*. 2015;524 7564:220-4.
- 36 276 4. Luo Y-J, Takeuchi T, Koyanagi R, Yamada L, Kanda M, Khalturina M, et al. The  
37 277 *Lingula* genome provides insights into brachiopod evolution and the origin of  
38 278 phosphate biomineralization. *Nature communications*. 2015;6:8301.
- 39 279 5. Boyle P and Rodhouse P. *Cephalopods: ecology and fisheries*. Oxford: Blackwe  
40 280 ll Science Ltd; 2005.
- 41 281 6. Hanlon RT and Messenger JB. *Cephalopod behaviour*. Cambridge: Cambridge  
42 282 University Press; 1998.
- 43 283 7. Guzik MT, Norman MD and Crozier RH. Molecular phylogeny of the benthic  
44 284 shallow-water octopuses (Cephalopoda: Octopodinae). *Mol Phylogen Evol*. 2005;  
45 285 37 1:235-48.

- 1 284 8. Hochner B, Shomrat T and Fiorito G. The octopus: a model for a comparative  
2 analysis of the evolution of learning and memory mechanisms. *Biol Bull.* 200  
3 285 6;210 3:308-17.  
4 286  
5 287 9. Mather JA. Cephalopod consciousness: behavioural evidence. *Conscious Cogn.*  
6 288 2008;17 1:37-48.  
7 289 10. MIFAFF. Food, Agriculture, Forestry and Fisheries statistical yearbook. Seoul:  
8 290 Forestry and Fisheries (MIFAFF) Press; 2012.  
9 291 11. Marçais G and Kingsford C. A fast, lock-free approach for efficient parallel co  
10 292 unting of occurrences of k-mers. *Bioinformatics.* 2011;27 6:764-70.  
11 293 12. Chin C-S, Peluso P, Sedlazeck FJ, Nattestad M, Concepcion GT, Clum A, et a  
12 294 l. Phased diploid genome assembly with single molecule real-time sequencing.  
13 295 *Nat Methods.* 2016;13 12:1050.  
14 296 13. Simão FA, Waterhouse RM, Ioannidis P, Kriventseva EV and Zdobnov EM. B  
15 297 USCO: assessing genome assembly and annotation completeness with single-cop  
16 298 y orthologs. *Bioinformatics.* 2015;31 19:3210-2.  
17 299 14. Gordon SP, Tseng E, Salamov A, Zhang J, Meng X, Zhao Z, et al. Widesprea  
18 300 d polycistronic transcripts in fungi revealed by single-molecule mRNA sequenci  
19 301 ng. *PLoS ONE.* 2015;10 7:e0132628.  
20 302 15. Holt C and Yandell M. MAKER2: an annotation pipeline and genome-database  
21 303 management tool for second-generation genome projects. *BMC bioinformatics.* 2  
22 304 011;12 1:491.  
23 305 16. Smit AFA HR, Green, P. RepeatMasker Open-3.0. 1996-2004 ([http://www.Repe  
24 306 atMakser.org](http://www.RepeatMasker.org)).  
25 307 17. Bao Z and Eddy SR. Automated de novo identification of repeat sequence fam  
26 308 ilies in sequenced genomes. *Genome research.* 2002;12 8:1269-76.  
27 309 18. Price AL, Jones NC and Pevzner PA. De novo identification of repeat families  
28 310 in large genomes. *Bioinformatics.* 2005;21 suppl\_1:i351-i8.  
29 311 19. Benson G. Tandem repeats finder: a program to analyze DNA sequences. *Nucl  
30 312 eic acids research.* 1999;27 2:573.  
31 313 20. Korf I. Gene finding in novel genomes. *BMC bioinformatics.* 2004;5 1:59.  
32 314 21. Nawrocki EP, Kolbe DL and Eddy SR. Infernal 1.0: inference of RNA alignm  
33 315 ents. *Bioinformatics.* 2009;25 10:1335-7.  
34 316 22. Gardner PP, Daub J, Tate J, Moore BL, Osuch IH, Griffiths-Jones S, et al. Rf

1 317 am: Wikipedia, clans and the “decimal” release. *Nucleic Acids Res.* 2010;39 su  
2  
3 318 ppl\_1:D141-D5.  
4  
5 319 23. Lowe TM and Eddy SR. tRNAscan-SE: a program for improved detection of t  
6  
7 320 ransfer RNA genes in genomic sequence. *Nucleic acids research.* 1997;25 5:955  
8  
9 321 .  
10 322 24. Li L, Stoeckert CJ, Jr. and Roos DS. OrthoMCL: identification of ortholog gro  
11  
12 323 ups for eukaryotic genomes. *Genome Res.* 2003;13 9:2178-89.  
13  
14 324 25. Finn RD, Bateman A, Clements J, Coggill P, Eberhardt RY, Eddy SR, et al.  
15  
16 325 Pfam: the protein families database. *Nucleic Acids Res.* 2013;42 D1:D222-D30.  
17  
18 326 26. Löytynoja A and Goldman N. An algorithm for progressive multiple alignment  
19  
20 327 of sequences with insertions. *Proceedings of the National Academy of Sciences*  
21  
22 328 of the United States of America. 2005;102 30:10557-62.  
23 329 27. Castresana J. Selection of conserved blocks from multiple alignments for their  
24  
25 330 use in phylogenetic analysis. *Molecular biology and evolution.* 2000;17 4:540-5  
26  
27 331 2.  
28 332 28. Stamatakis A. RAxML version 8: a tool for phylogenetic analysis and post-ana  
29  
30 333 lysis of large phylogenies. *Bioinformatics.* 2014;30 9:1312-3.  
31  
32 334 29. Hedges SB, Dudley J and Kumar S. TimeTree: a public knowledge-base of div  
33  
34 335 ergence times among organisms. *Bioinformatics.* 2006;22 23:2971-2.  
35  
36 336 30. Han MV, Thomas GW, Lugo-Martinez J and Hahn MW. Estimating gene gain  
37  
38 337 and loss rates in the presence of error in genome assembly and annotation usi  
39  
40 338 ng CAFE 3. *Molecular biology and evolution.* 2013;30 8:1987-97.  
41 339 31. Yang Z. PAML 4: phylogenetic analysis by maximum likelihood. *Molecular bi*  
42  
43 340 ology and evolution. 2007;24 8:1586-91.  
44  
45 341 32. Sievers F, Wilm A, Dineen D, Gibson TJ, Karplus K, Li W, et al. Fast, scala  
46  
47 342 ble generation of high-quality protein multiple sequence alignments using Clusta  
48  
49 343 l Omega. *Molecular systems biology.* 2011;7 1:539.  
50  
51 344 33. Edgar RC. MUSCLE: multiple sequence alignment with high accuracy and hig  
52  
53 345 h throughput. *Nucleic Acids Res.* 2004;32 doi:10.1093/nar/gkh340.  
54 346 34. Price MN, Dehal PS and Arkin AP. FastTree 2—approximately maximum-likelih  
55  
56 347 ood trees for large alignments. *PloS one.* 2010;5 3:e9490.  
57  
58 348 35. Wicker T, Sabot F, Hua-Van A, Bennetzen JL, Capy P, Chalhoub B, et al. A  
59  
60 349 unified classification system for eukaryotic transposable elements. *Nature Revie*

1 350  
2  
3  
4 351  
5  
6  
7  
8  
9  
10  
11  
12  
13  
14  
15  
16  
17  
18  
19  
20  
21  
22  
23  
24  
25  
26  
27  
28  
29  
30  
31  
32  
33  
34  
35  
36  
37  
38  
39  
40  
41  
42  
43  
44  
45  
46  
47  
48  
49  
50  
51  
52  
53  
54  
55  
56  
57  
58  
59  
60  
61  
62  
63  
64  
65

ws Genetics. 2007;8 12:973-82.

1 352 **Figure legends**

2  
3 353  
4  
5 354 **Figure 1:** Common long-arm octopus (*Octopus minor*). **a** Photograph of *O. minor*. **b** Habitat  
6 structure of mudflats and phenotypic differences between *O. minor* and *O. bimaculoides*. *O.*  
7 *minor* has a smaller body size and possesses longer, thinner arms than those of *O. bimaculoides*.  
8  
9 356 **c** The distribution of *O. minor* is shown in dark red. The distribution map was updated from  
10  
11 357 Roper *et al.* (1984).  
12  
13 358  
14  
15 359

16  
17  
18 360 **Figure 2:** Gene family analysis for 14 bilaterian species. **a** Divergence times estimated from  
19 genome sequences of 14 bilaterian species. **b** Heat map of expanded Pfam domains in the *O.*  
20 *minor* genome. OM, *Octopus minor*; OB, *Octopus bimaculoides*; LG, *Lottia gigantea*; CG,  
21 *Crassostrea gigas*; PF, *Pinctada fucata*; LA, *Lingula anatina*; CT, *Capitella teleta*; HR,  
22 *Helobdella robusta*; CE, *Caenorhabditis elegans*; DM, *Drosophila melanogaster*; DP,  
23 *Daphnia pulex*; SP, *Strongylocentrotus purpuratus*; MM, *Mus musculus*; HS, *Homo sapiens*.  
24  
25 364  
26  
27 365  
28  
29 366

30  
31  
32 367 **Figure 3:** Transposable element (TE) accumulation history in the *Octopus* genomes. Kimura  
33 distance-based copy divergence analysis of TEs for **a**, *O. minor* and **b**, *O. bimaculoides*. *x*-axis,  
34 368 K-value; *y*-axis, genome coverage for each type of TE.  
35 369  
36  
37  
38 370  
39  
40 371  
41  
42 372  
43  
44  
45  
46  
47  
48  
49  
50  
51  
52  
53  
54  
55  
56  
57  
58  
59  
60  
61  
62  
63  
64  
65

**Table 1 Benchmarking Universal Single-Copy Orthologs (BUSCO) evaluated for the completeness of the *O. minor* genome assembly.**

|                                     | Eukaryote |      | Metazoa |      |
|-------------------------------------|-----------|------|---------|------|
|                                     | Count     | %    | Count   | %    |
| Complete BUSCOs (C)                 | 224       | 73.9 | 745     | 76.2 |
| Complete and single-copy BUSCOs (S) | 193       | 63.7 | 628     | 64.2 |
| Complete and duplicated BUSCOs (D)  | 31        | 10.2 | 117     | 12   |
| Fragmented BUSCOs (F)               | 26        | 8.6  | 82      | 8.4  |
| Missing BUSCOs (M)                  | 53        | 17.5 | 151     | 15.4 |
| Total BUSCO groups searched         | 303       |      | 978     |      |

**Table 2** Overview of the assembly and annotation of the *Octopus minor* genome.

|                                |               |
|--------------------------------|---------------|
| Total length (bp)              | 5,090,349,614 |
| Number of contigs              | 41,584        |
| Contig N50 (bp)                | 196,941       |
| Largest contigs (bp)           | 3,027,443     |
| GC content (%)                 | 36.33         |
| Number of protein-coding genes | 30,010        |

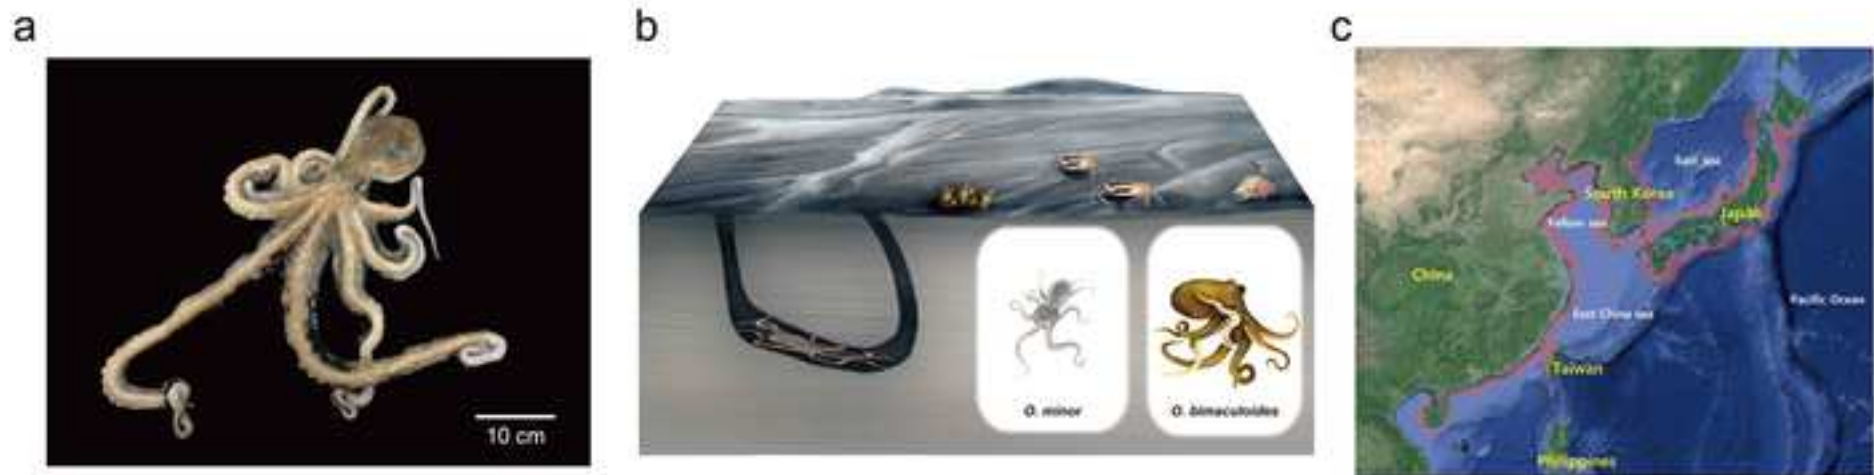



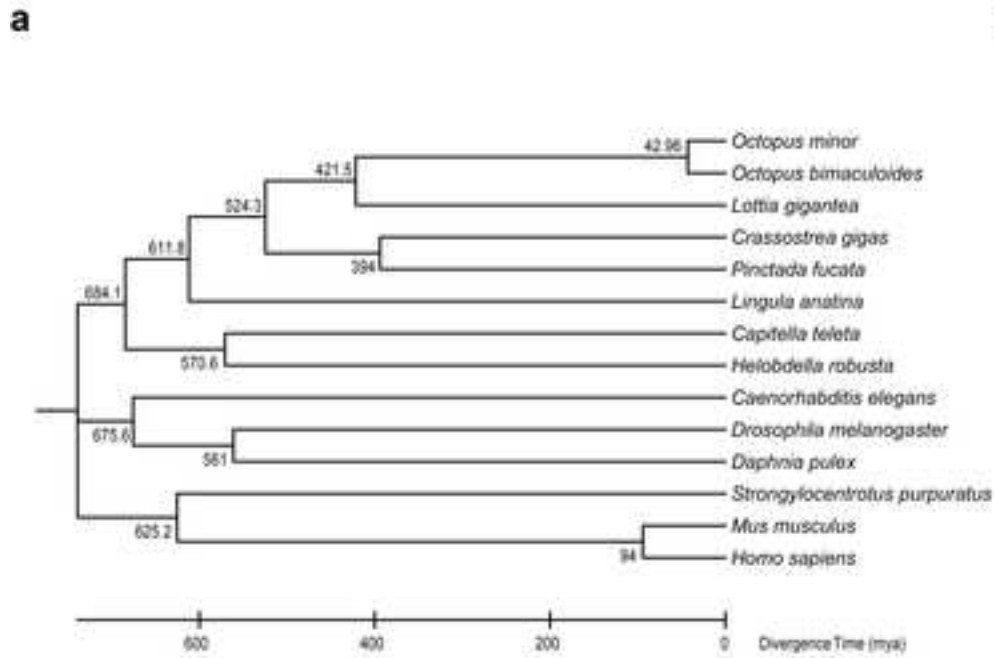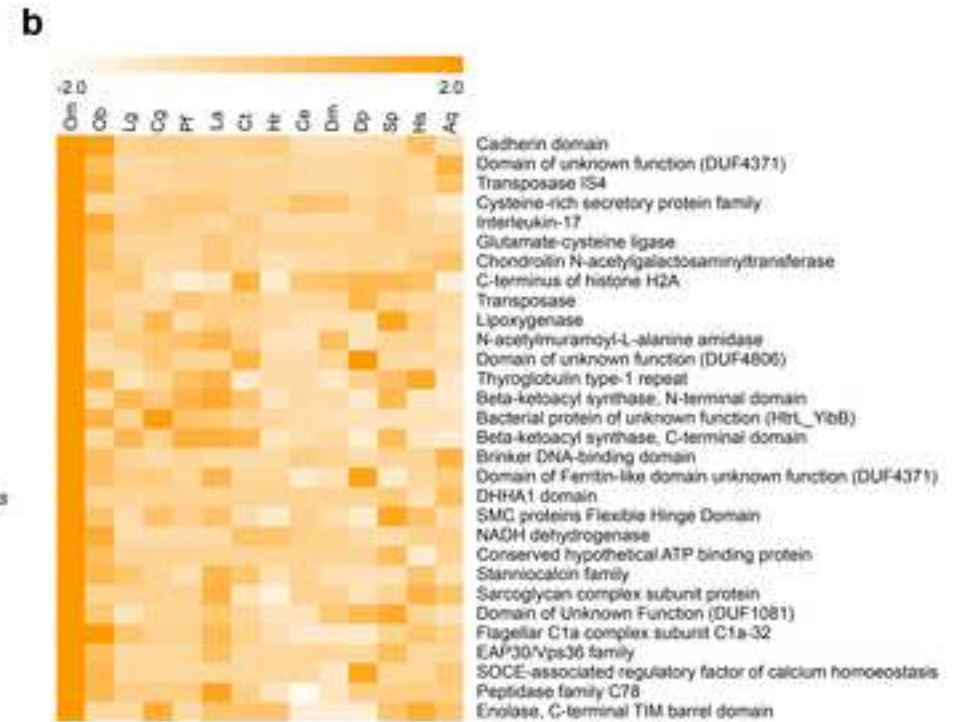

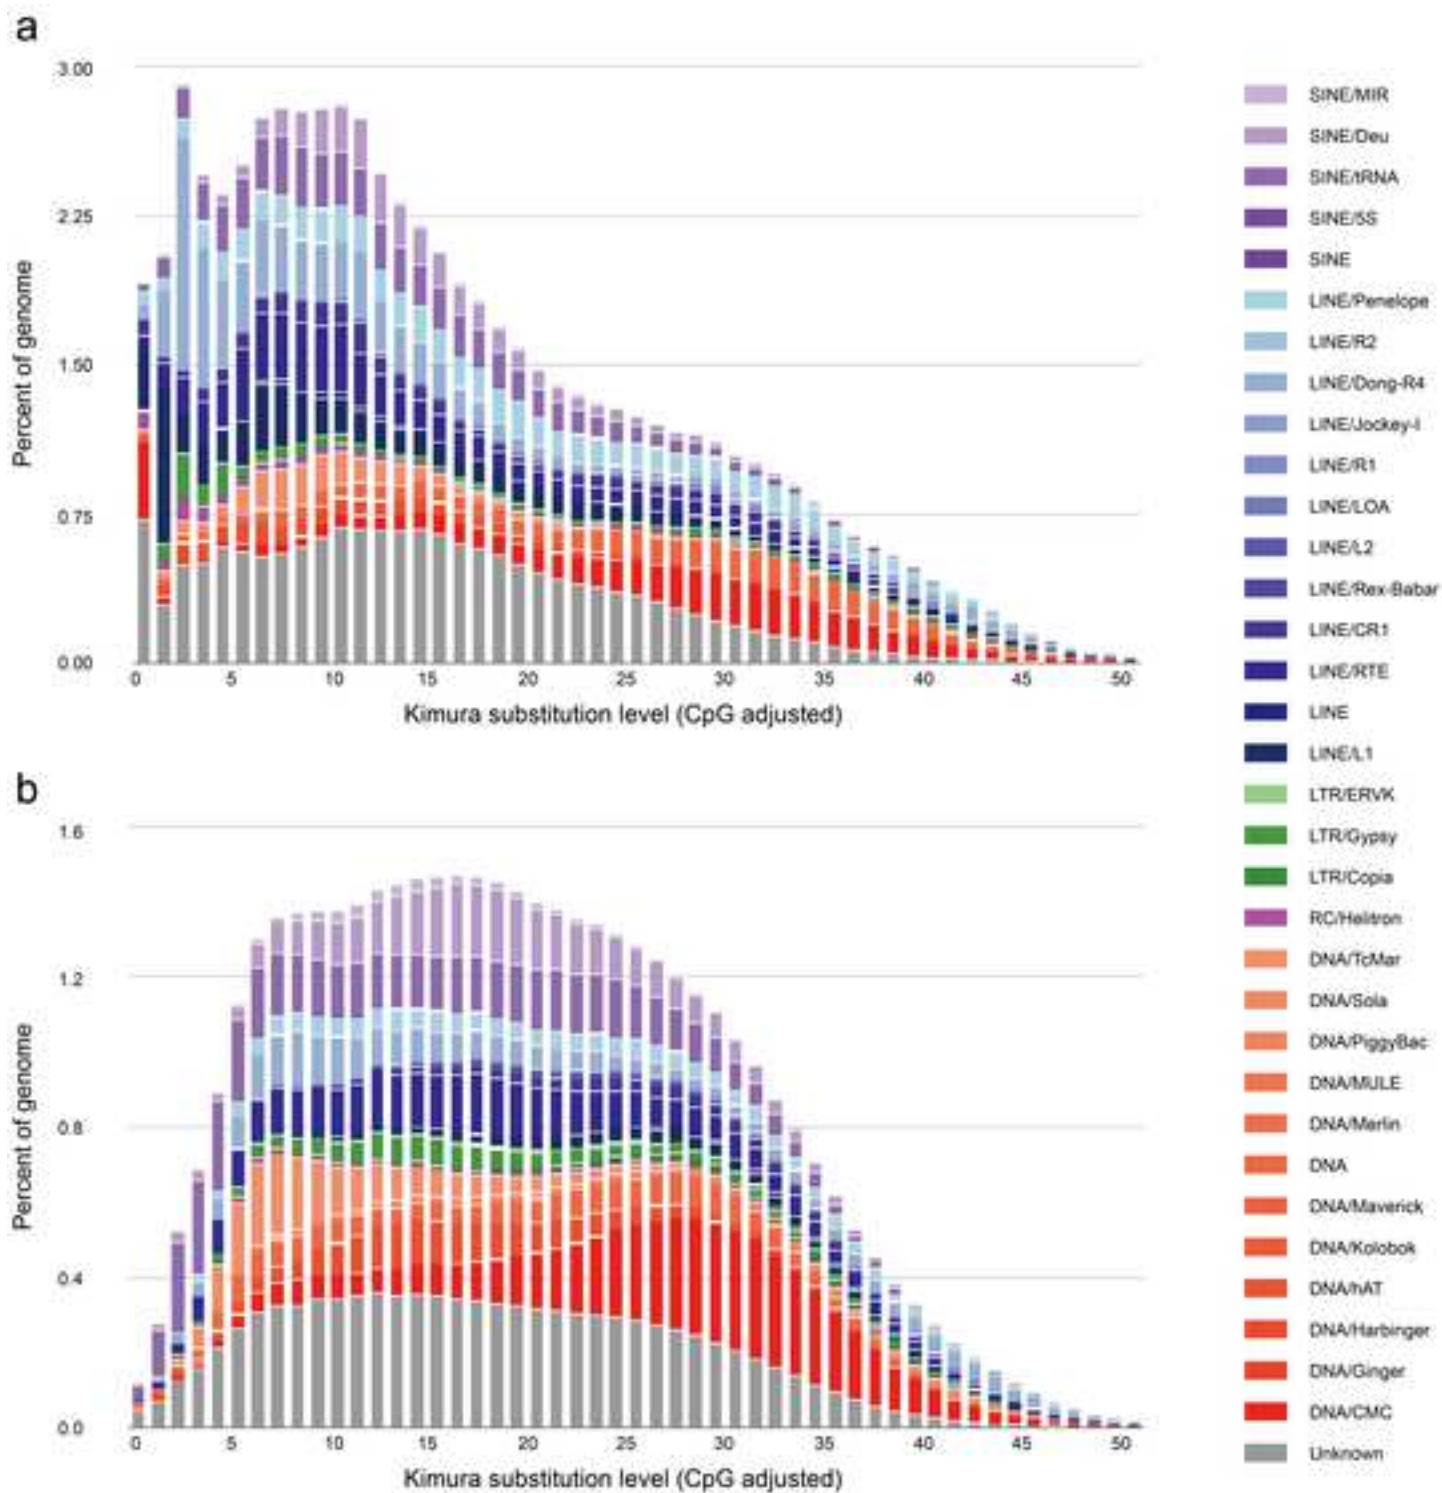

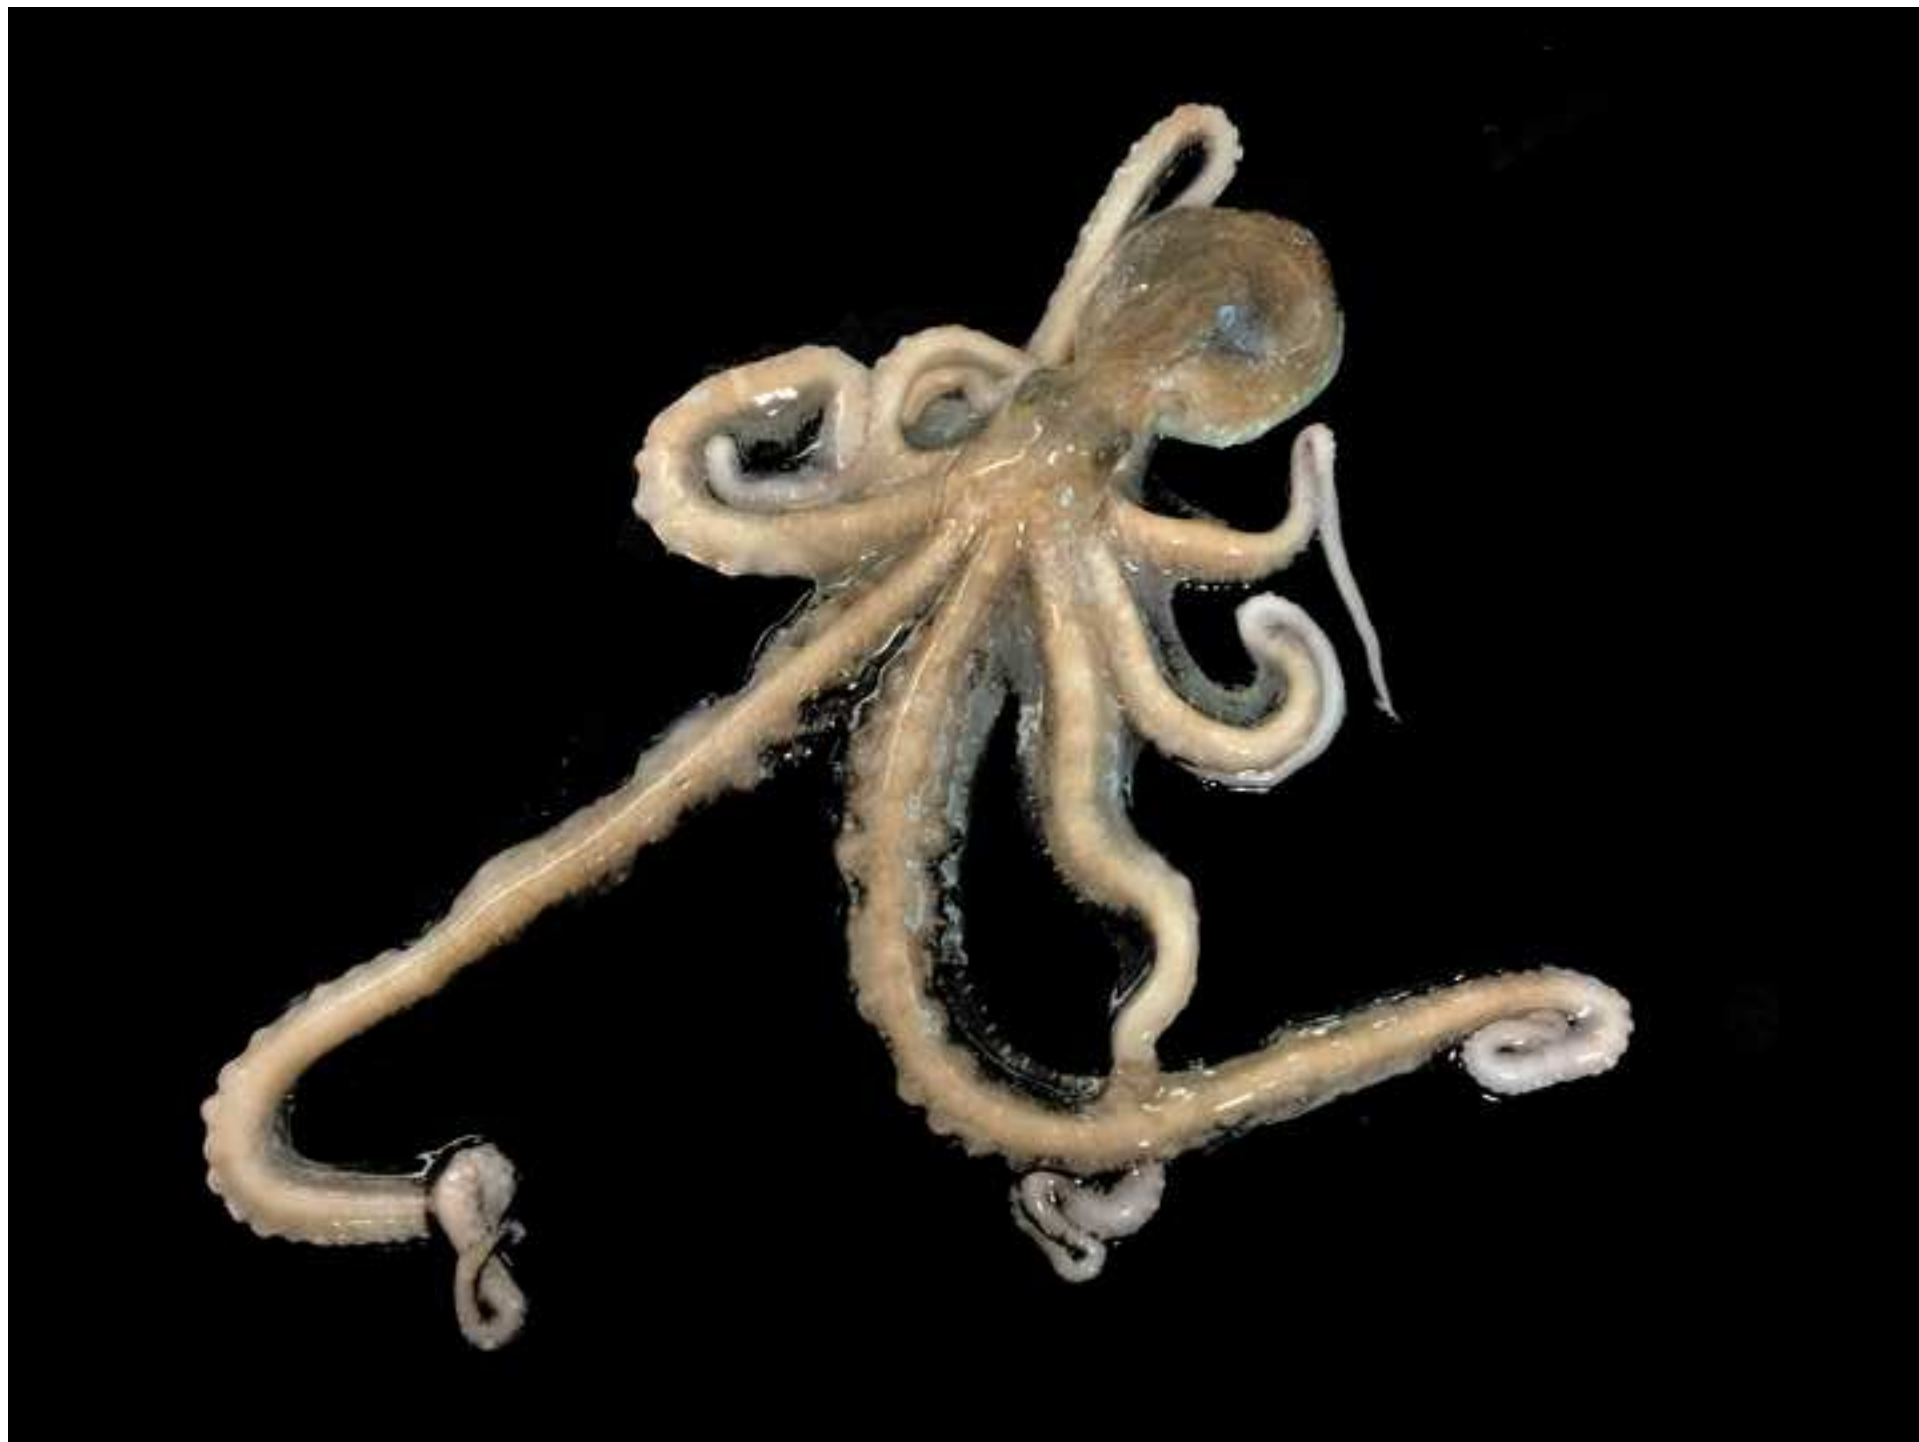

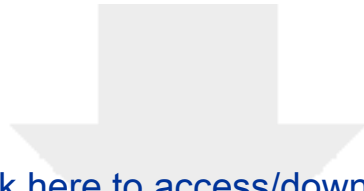

Click here to access/download  
**Supplementary Material**  
Supplementary text\_commands.docx

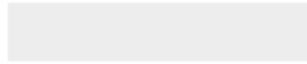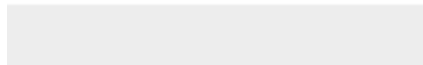

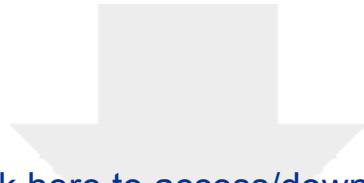

Click here to access/download  
**Supplementary Material**  
GIGA\_Additional file 1\_Table.docx



Supplement: giy119_giga-d-18-00174_revision_1.pdf [file giy119_giga-d-18-00174_revision_1.pdf]
